# Supplementary material
Source: PubMed Central journal article supplement (PMC6682100)
Supplement: ao9b00711_si_001.pdf [file ao9b00711_si_001.pdf]

## Supplementary information

### FABRICATION OF POROUS HYDROGENATION CATALYSTS BY SELECTIVE LASER SINTERING 3D PRINTING TECHNIQUE

Elmeri Lahtinen, Lotta Turunen, Mikko M. Hänninen, Kalle Kolari, Heikki M. Tuononen, Matti Haukka\*

Department of Chemistry, University of Jyväskylä, P.O. Box 35, FI-40014 Jyväskylä, Finland.

e-mail: \* [matti.o.haukka@jyu.fi](mailto:matti.o.haukka@jyu.fi)

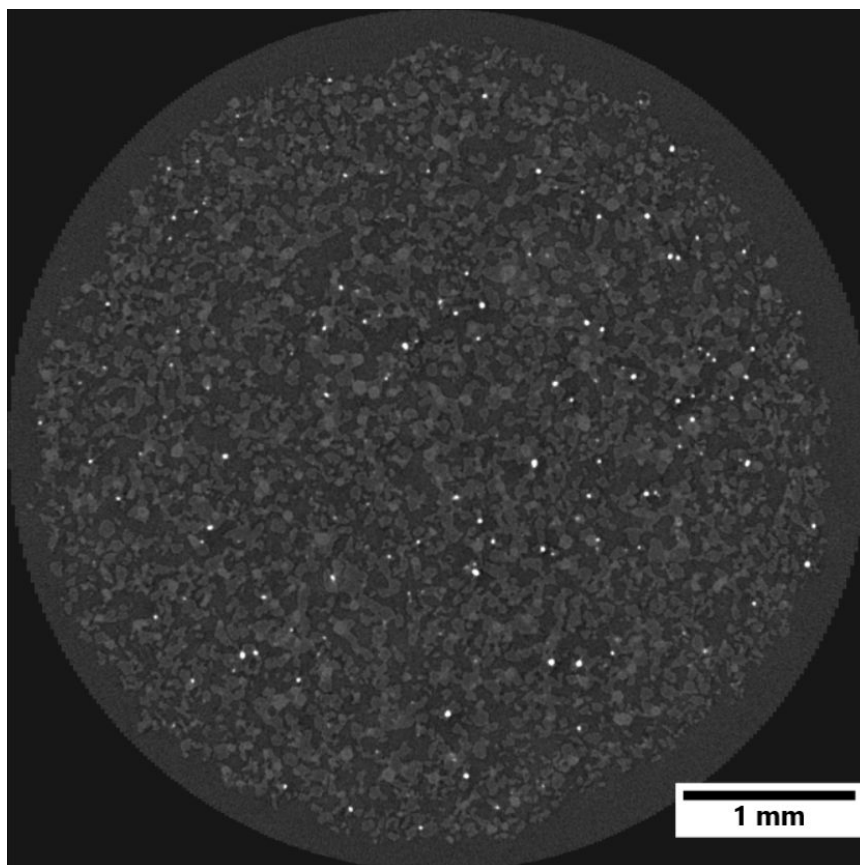

**Figure S1.** X-ray tomography image of an SLS 3D printed PdSiO<sub>2</sub>/PP catalyst. SiO<sub>2</sub> can be seen as the white particles in the image.

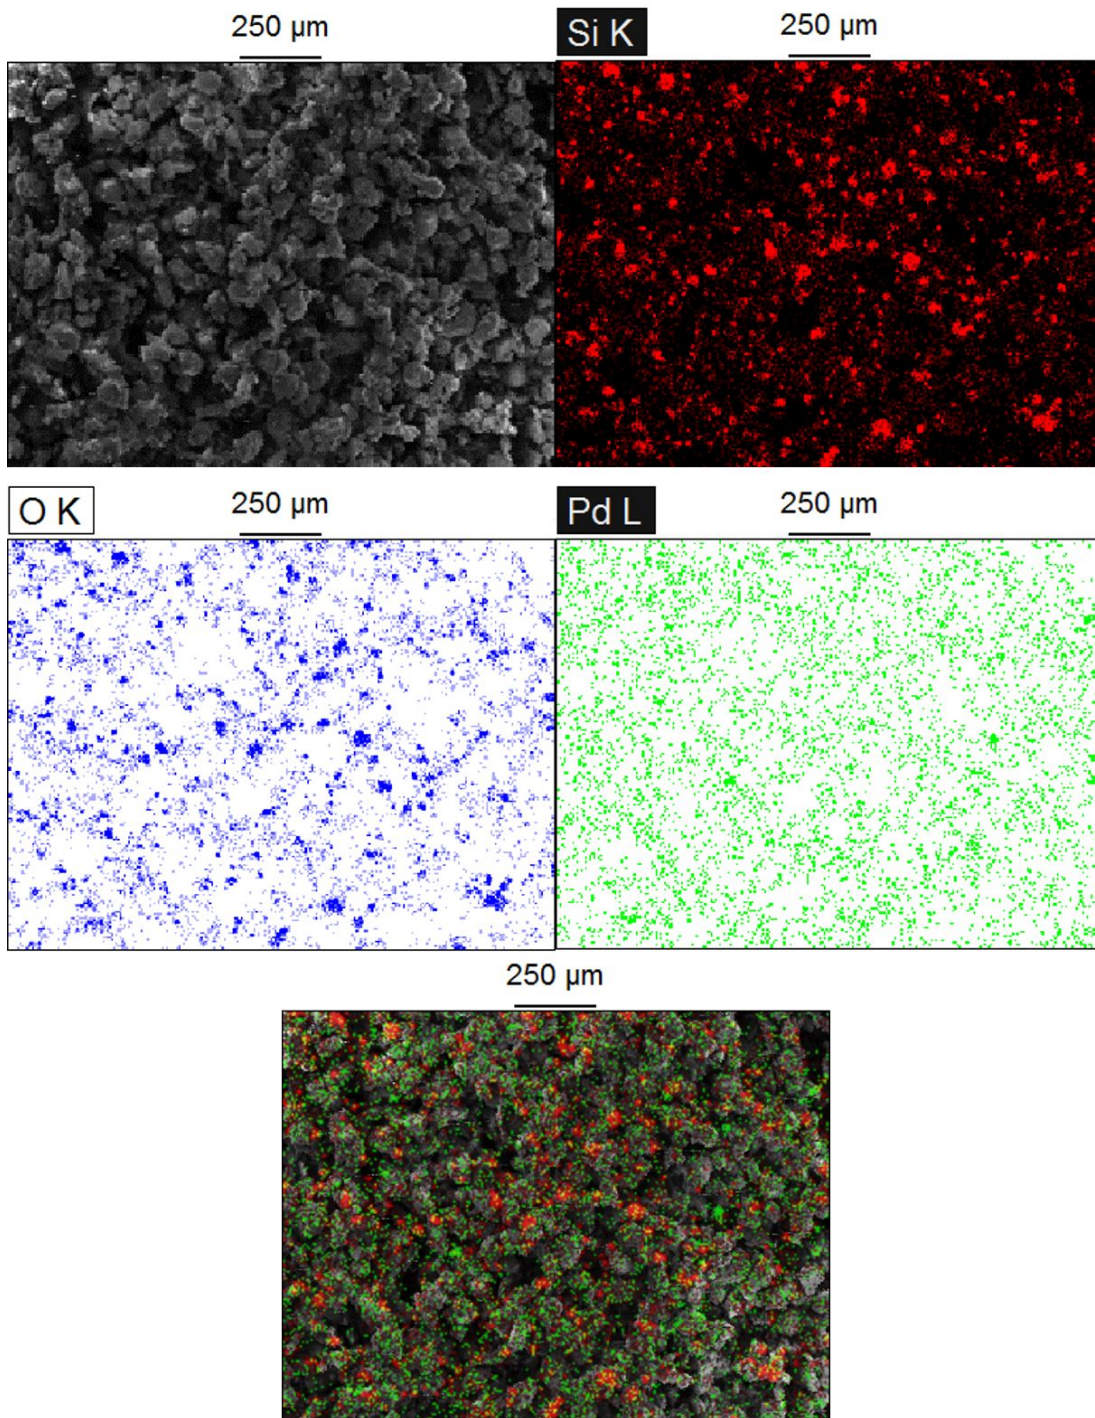

**Figure S2.** Spectral imaging results from SEM-EDS analysis received for the SLS 3D printed PdSiO<sub>2</sub>/PP catalyst. The bottom image shows the overlaid images of the sample, Si and Pd. Figures S2-S4 are replicated taken from different PdSiO<sub>2</sub>/PP samples to show the even distribution between different samples.

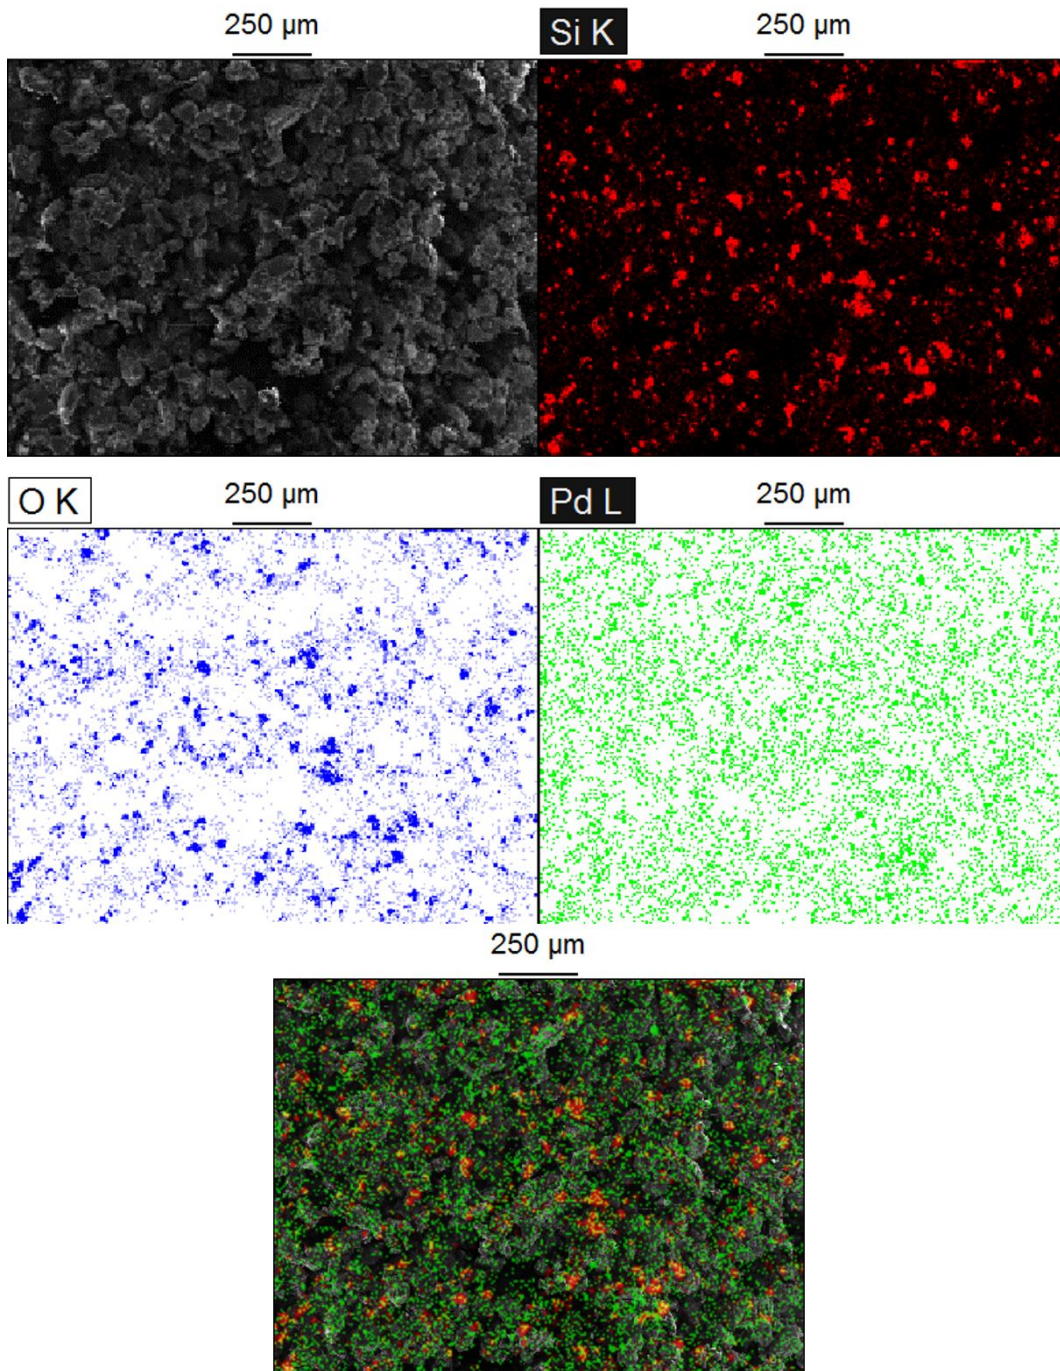

**Figure S3.** Spectral imaging results from SEM-EDS analysis received for the SLS 3D printed PdSiO<sub>2</sub>/PP catalyst. The bottom image shows the overlaid images of the sample, Si and Pd. Figures S2-S4 are replicated taken from different PdSiO<sub>2</sub>/PP samples to show the even distribution between different samples.

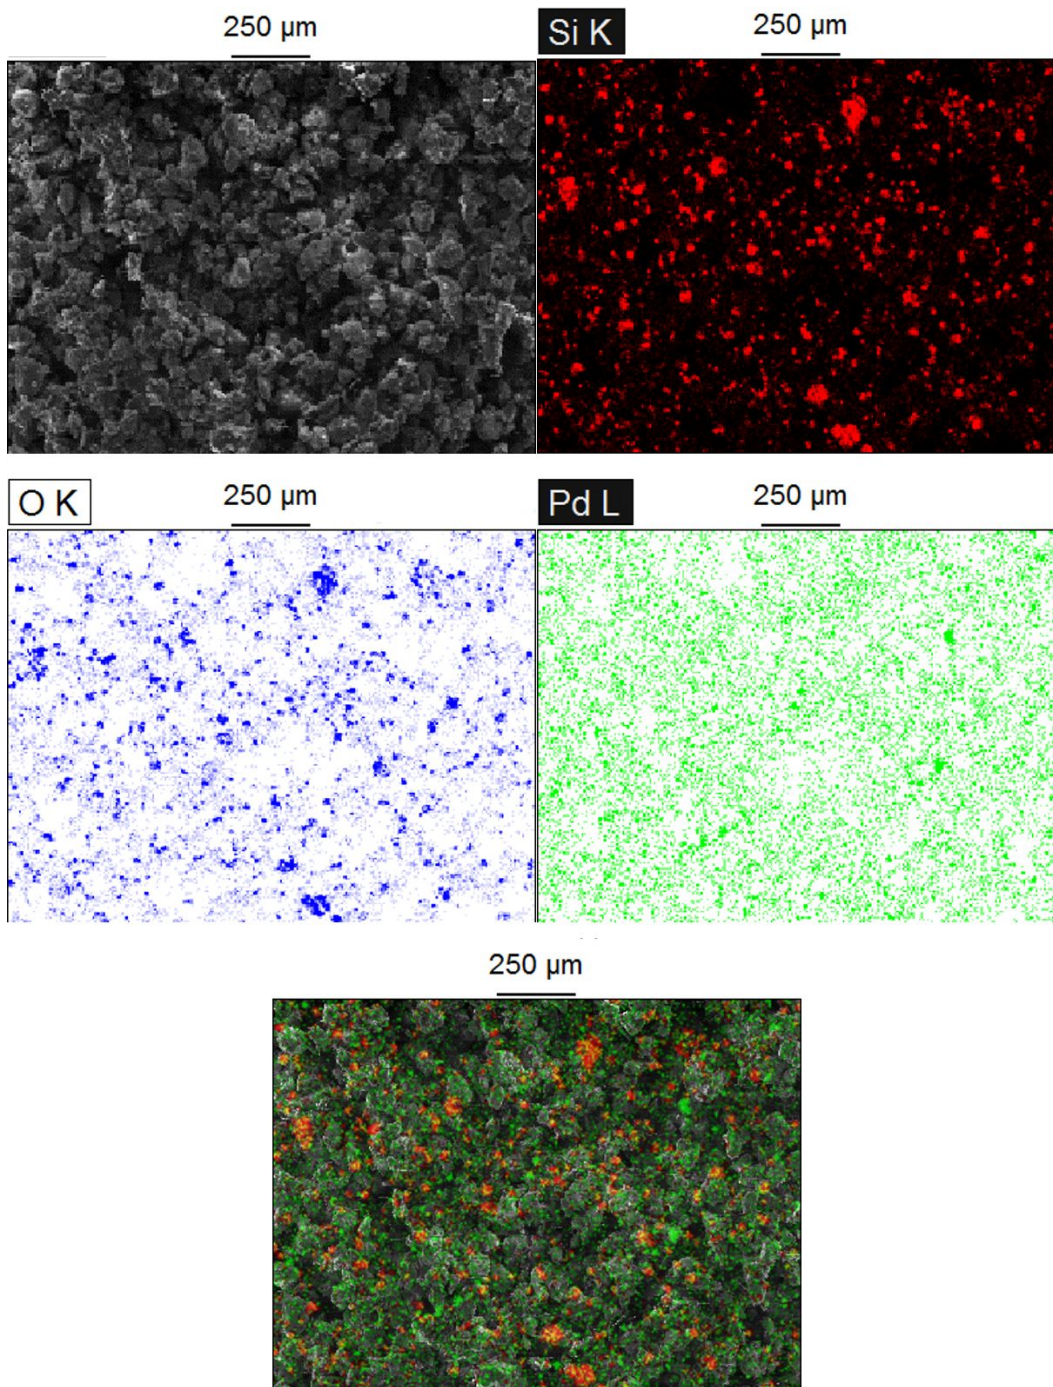

**Figure S4.** Spectral imaging results from SEM-EDS analysis received for the SLS 3D printed PdSiO<sub>2</sub>/PP catalyst. The bottom image shows the overlaid images of the sample, Si and Pd. Figures S2-S4 are replicated taken from different PdSiO<sub>2</sub>/PP samples to show the even distribution between different samples.

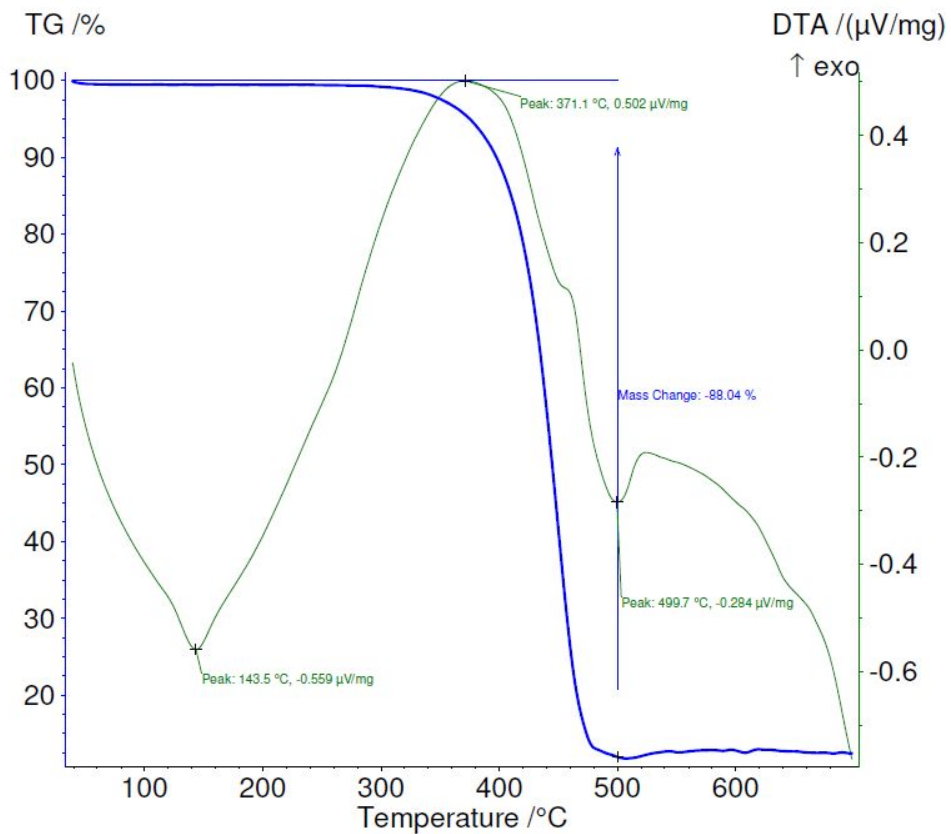

**Figure S5.** TG/DTA curve for SLS 3D printed PdSiO<sub>2</sub>/PP catalyst. The measurement was done by increasing temperature from RT to 700 °C at the speed of 10 °C per minute.

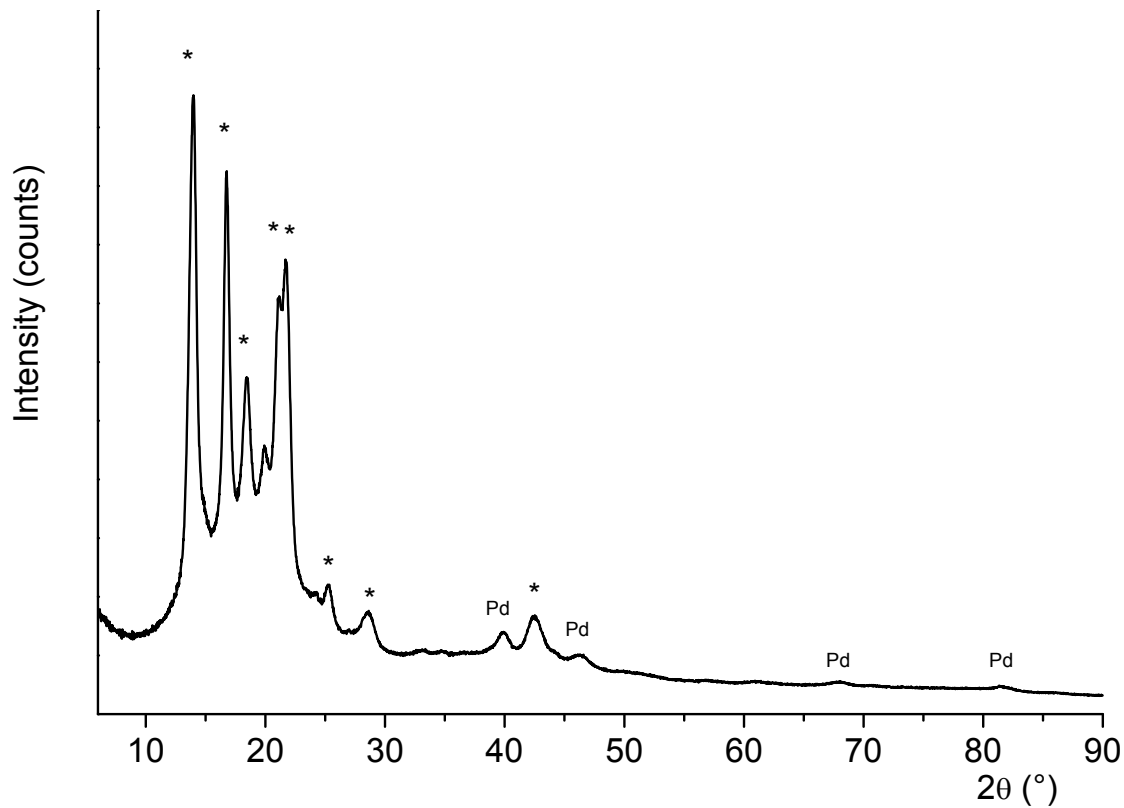

**Figure S6.** Powder X-ray diffraction pattern of the PdSiO<sub>2</sub>/PP powder sample. Characteristic peaks of polypropylene phase are marked by “\*”, and metallic palladium by “Pd”.

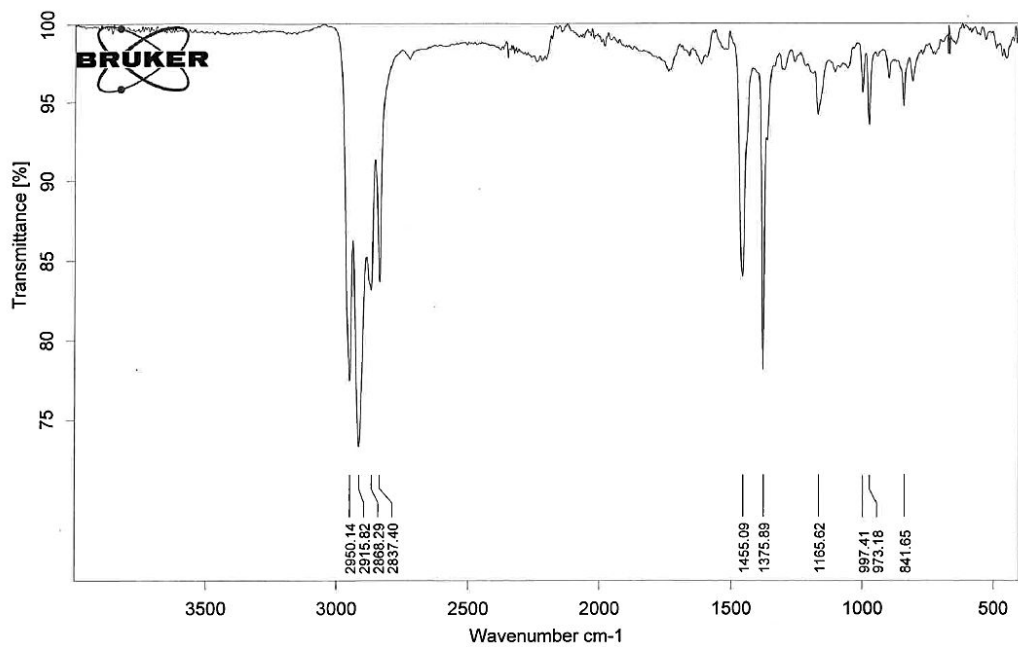

**Figure S7.** FTIR spectrum of an unused polypropylene powder.

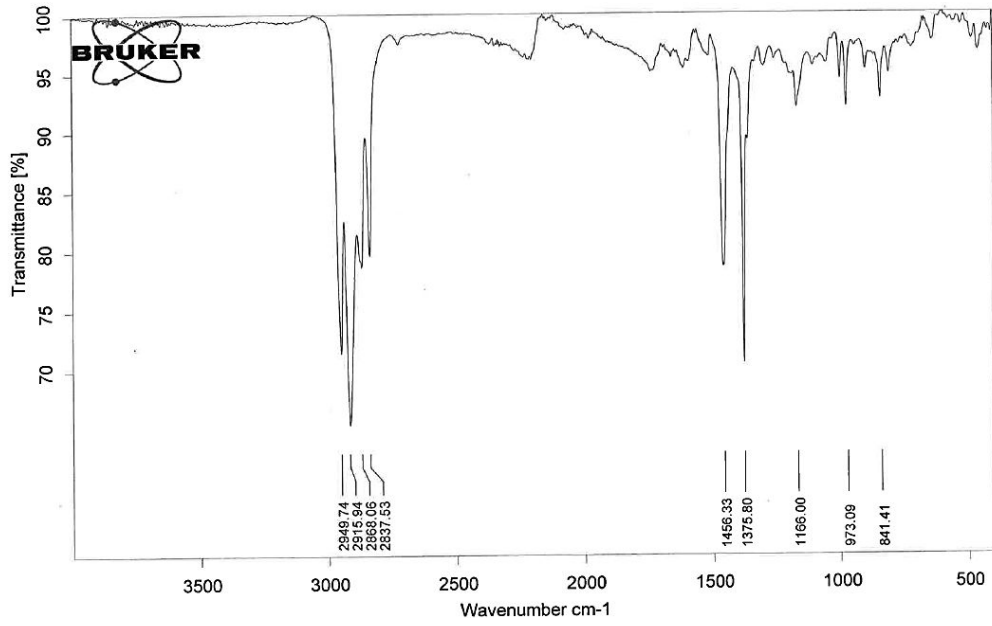

Figure S8. FTIR spectrum of a used polypropylene powder.

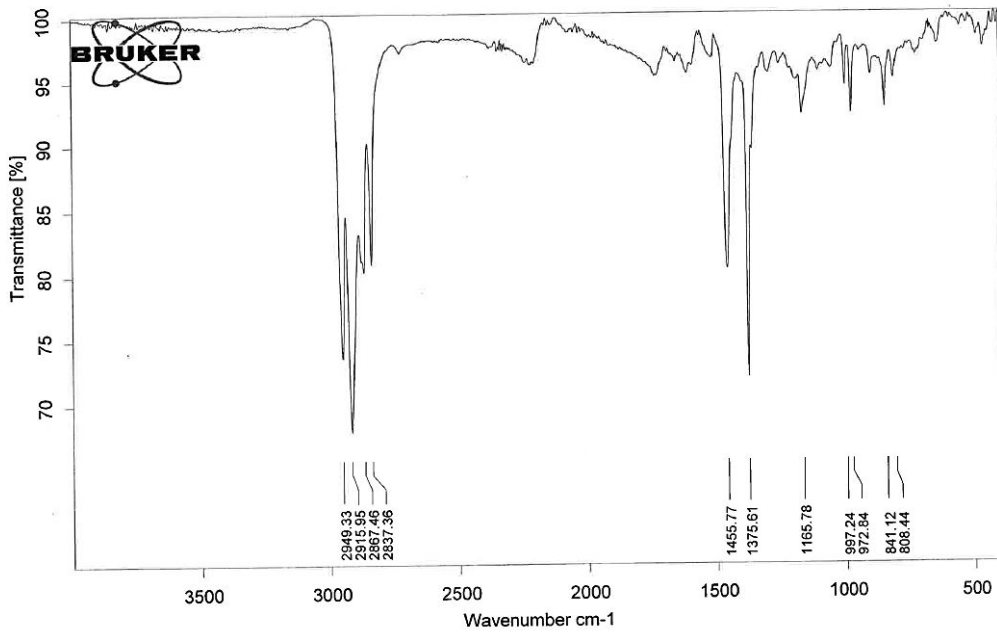

Figure S9. FTIR spectrum of a SLS 3D printed object that was made out of polypropylene powder.



**Table S1.** Determined palladium concentration in the SLS 3D printed stir bar sleeve samples. Done using microwave-assisted leaching followed by ICP-OES analysis.

|          | <b>Pd concentration<br/>(w-%)</b> |
|----------|-----------------------------------|
| Sample 1 | 0.490                             |
| Sample 2 | 0.492                             |
| Sample 3 | 0.460                             |
| Sample 4 | 0.474                             |
| Sample 5 | 0.482                             |
| Sample 6 | 0.500                             |
| Sample 7 | 0.490                             |
| Sample 8 | 0.505                             |

**Table S2.** SEM-EDS results of C, O, Si, Pd and Au of three different SLS 3D stir bar sleeve samples. Gold is derived from the 6 nm layer that was sputtered onto the samples for the imaging. Image resolution of 1024 by 768 with a pixel size of 1.63  $\mu\text{m}$  was used. Acceleration voltage was 15 kV.

|    | <b>Concentration<br/>(w-%)</b><br>Sample 1 | <b>Concentration<br/>(w-%)</b><br>Sample 2 | <b>Concentration<br/>(w-%)</b><br>Sample 3 |
|----|--------------------------------------------|--------------------------------------------|--------------------------------------------|
| C  | 60.28                                      | 61.81                                      | 62.29                                      |
| O  | 12.85                                      | 13.7                                       | 14.78                                      |
| Si | 4.3                                        | 4.13                                       | 3.98                                       |
| Pd | 0.76                                       | 0.41                                       | 0.54                                       |
| Au | 21.81                                      | 19.95                                      | 18.51                                      |
